# Supplementary material for: Predicting COVID-19 Severity with a Specific Nucleocapsid Antibody plus Disease Risk Factor Score
Source: bioRxiv or medRxiv preprint supplement (doi:10.1101/2020.10.15.341743), 2021-03-08
Supplement: Supplementary file [file media-1.pdf]

## Supplementary Materials

### Antibody Response to a Nucleocapsid Epitope as a Marker for COVID-19 Disease Severity

Sanjana Sen<sup>1†</sup>, Emily C. Sanders<sup>2†</sup>, Kristin N. Gabriel<sup>1†</sup>, Brian M. Miller<sup>2</sup>, Hariny M. Isoda<sup>2</sup>, Gabriela S. Salcedo<sup>2</sup>, Jason E. Garrido<sup>1</sup>, Rebekah P. Dyer<sup>1</sup>, Rie Nakajima<sup>3</sup>, Aarti Jain<sup>3</sup>, Alicia M. Santos<sup>2</sup>, Keertna Bhuvan<sup>2</sup>, Delia F. Tifrea<sup>4</sup>, Joni L. Ricks-Oddie<sup>5,6</sup>, Philip L. Felgner<sup>3</sup>, Robert A. Edwards<sup>4</sup>, Sudipta Majumdar<sup>2</sup>, and Gregory A. Weiss<sup>1,2,7\*</sup>

<sup>1</sup> Department of Molecular Biology & Biochemistry, University of California, Irvine, Irvine CA 92697- 3900 USA

<sup>2</sup> Department of Chemistry, University of California, Irvine, Irvine CA 92697-2025 USA

<sup>3</sup> Department of Physiology and Biophysics, University of California, Irvine, Irvine CA 92697-4560 USA

<sup>4</sup> Department of Pathology and Laboratory Medicine, University of California, Irvine, Irvine CA 92697-4800 USA

<sup>5</sup> Center for Statistical Consulting, Department of Statistics, University of California, Irvine, Irvine CA 92697-1250 USA

<sup>6</sup> Biostatistics, Epidemiology and Research Design Unit, Institute for Clinical and Translational Sciences, University of California, Irvine, Irvine CA 92697-4094 USA

<sup>7</sup> Department of Pharmaceutical Sciences, University of California, Irvine, Irvine CA 92697-3958 USA

† These authors contributed equally.

\* Address correspondence to [gweiss@uci.edu](mailto:gweiss@uci.edu)

## Table of contents

|                                                                                                                                                     |    |
|-----------------------------------------------------------------------------------------------------------------------------------------------------|----|
| Materials and Methods .....                                                                                                                         | 3  |
| Cloning .....                                                                                                                                       | 3  |
| Purification and preparation of phage .....                                                                                                         | 3  |
| Patient sample collection .....                                                                                                                     | 3  |
| Plasma phage-antibody ELISA.....                                                                                                                    | 4  |
| Serum coronavirus antigen microarray (COVAM) .....                                                                                                  | 4  |
| Statistical analysis.....                                                                                                                           | 4  |
| Supplementary Text.....                                                                                                                             | 6  |
| Table S1. Phage-displayed putative epitopes of SARS-CoV-2 and ortholog Ep9 sequences from SARS, MERS, HKU-1, and NL63.....                          | 6  |
| Fig. S1. Quality control ELISA (QC ELISA) for phage-displayed, epitope candidates.                                                                  | 7  |
| Fig. S2. Epitope homology of SARS-CoV-2 with four phylogenetically related coronaviruses known to infect humans. ....                               | 8  |
| Fig. S3. Variation in degree of IgG seroreactivity of patient plasma.....                                                                           | 9  |
| Fig. S4. Variation in degree of IgM seroreactivity of patient plasma. ....                                                                          | 10 |
| Table. S2. Demographics and clinical characteristics of COVID-19 patients categorized by $\alpha$ Ep9 Abs response.....                             | 11 |
| Fig. S5. Comparison of disease severity and clinical parameters of COVID-19 patients with $\alpha$ Ep9 Abs. ....                                    | 12 |
| Fig. S6. Association of COVID-19 patients with $\alpha$ Ep9 Abs with inflammatory cytokine and tissue damage markers. ....                          | 13 |
| Fig. S7. Schematic of FlagTemplate used for cloning putative epitopes.....                                                                          | 14 |
| Table S3. Oligos used for cloning of phage-displayed putative epitope for SARS-CoV-2 and ortholog Ep9 epitope from SARS, MERS, HKU-1, and NL63..... | 15 |
| Table. S4. Antigens used on COVAM. ....                                                                                                             | 17 |

## Materials and Methods

### Cloning

For phage display of epitopes, the pm1165a phagemid vector as previously described (42) as engineered to encode an N-terminal FLAG-tag and a C-terminal fusion to the P8 coat protein of M13-phage. This template, termed FlagTemplate, was used for subcloning of SARS-CoV-2, SARS, MERS, HKU-1 and NL63 epitopes. A vector map of the FlagTemplate (**Fig. S7**), cloning procedures, and a list of oligos (**Table S3**) for Q5 site-directed mutagenesis and Gibson Assembly are provided here.

Putative epitopes for phage display were cloned via Q5 site-directed mutagenesis or Gibson Assembly (New England Biolabs) according to the manufacturer's instructions. For large epitopes (>500 bp), such as Ep17, Gibson Assembly was conducted in two PCR steps with the **FlagTemplate** or pCAGGS containing the SARS-CoV-2 S protein gene (BEI Resources) to generate the vectors and inserts, respectively. The Gibson Assembly (2  $\mu$ L) or KLD mix (5  $\mu$ L) was transformed into Nova Blue *E. coli* competent cells, and transformants were plated on a carbenicillin-supplemented (50  $\mu$ g/mL) agar plate before incubation at 37 °C overnight. Five single colonies were selected to inoculate 4 mL of SOC media in a 15 mL culture tube supplemented with carbenicillin (50  $\mu$ g/mL). The seed cultures were incubated at 37 °C with shaking at 225 rpm for 8-12 h. Phagemid DNA was isolated using the QIAprep spin miniprep kit according to the manufacturer's instructions. The successful subcloning of the ORF encoding each epitope was verified via DNA sequencing (Genewiz).

### Purification and preparation of phage

Phage were propagated and purified using procedures previously described (43) with the following changes. A single colony was selected to inoculate 15 mL of 2YT and shaken at 37 °C until the OD<sub>600</sub> reached 0.6. After incubation at 37 °C for 45 min, 8 mL of the primary culture was used to inoculate 300 mL of 2YT supplemented with carbenicillin (50  $\mu$ g/mL), kanamycin (20  $\mu$ g/mL), and isopropyl  $\beta$ -D thiogalactopyranoside (IPTG, 30  $\mu$ M).

To precipitate the phage, the cultures were centrifuged at 10 krpm (15300 x g) for 10 min at 4 °C. The supernatant was decanted into a centrifuge tube containing 60 mL PEG-8000 (20%, w/v) and NaCl (2.5 M). The tube was inverted 10 times and stored on ice for 30 min followed by an additional centrifugation at 10 krpm (15300 x g) for 20 min at 4 °C. The supernatant was decanted, and tubes were centrifuged for an additional 4 min at 4 krpm (2429 x g) at 4 °C. The pellets were resuspended in PBS (10 mM phosphate, 137 mM NaCl, pH 7.2) with TWEEN 20 (0.05%, v/v) and glycerol (10%, v/v), separated into 1 mL aliquots, flash frozen with liquid nitrogen, and stored at -80 °C. For binding assays via ELISA, the purified phage was thawed on ice, precipitated a second time as before. The quality of each phage preparation was routinely checked by quality control ELISA, termed QC ELISA, to a FLAG peptide fused to the N-terminus of each epitope (**Fig. S7**); additionally, PCR using Oligo69 and Oligo70 followed by DNA sequencing (Genewiz) was performed for every phage preparation. Such quality control allowed for identification of toxic clones; for example, C8, was apparently toxic to *E. coli*, and three protein epitopes failed to express in *E. coli* for unknown reasons. The phage concentration was determined by absorbance at 260 nm using a coefficient of molar absorptivity of 0.003 nM<sup>-1</sup> cm<sup>-1</sup> and diluted to 40 nM in PBS.

### Patient sample collection

The UC Irvine Experimental Tissue Resource operates under a blanket IRB protocol (UCI #2012-8716) that gives ETR personnel 'Honest Broker' status and enables the collection of any fluid or tissue remnant in excess to that needed for clinical diagnosis and distribution to investigators under the conditions of their own IRB approval. Patients undergoing COVID testing in the Emergency Department or on the inpatient service with confirmed COVID (+) pharyngeal swabs, were followed for their blood collections daily. Specimens collected originally for diagnostic purposes were processed and stored by the hospital laboratory in a

manner compliant with College of American Pathologists (CAP) standards. EDTA-anticoagulated whole blood was stored for 2 days at 4 °C after clinical diagnosis and released for research purposes. Plasma from heparin-anticoagulated blood was centrifuged immediately after collection and preserved at 4 °C for 3-4 days before being released for research use. All COVID (+) specimens were handled under BSL-2 conditions, aliquoted into screw cap cryovials, and stored at -80 °C long term with constant temperature monitoring. Specimens were coded by the ETR with unique de-identifiers, and accompanying clinical information was stripped of PHI, such that investigators could receive specimens under a Non Human Subjects Determination exemption from the UC Irvine IRB. All samples from SARS-CoV-2 infected patients were inactivated by incubation in a water bath at 56 °C for 30 mins (44), aliquoted (40 µL each), and stored at -80 °C.

#### Phage ELISA with plasma

The phage-displayed SARS-CoV-2 epitopes were used in phage ELISAs with patient plasma samples diluted 100-fold in coating buffer (50 mM Na<sub>2</sub>CO<sub>3</sub>, pH 9.6). After incubation in a 96-well Nunc MaxiSorp flat-bottom microtiter plate with shaking at 150 rpm at 4 °C for 12-18 h, plasma was aspirated by a plate washer (BioTek). Next, the plate was treated with 100 µL per well of ChonBlock Blocking/Sample Dilution Buffer (Chondrex, Inc.) for 1 h with shaking at 150 rpm at room temperature and washed three times with wash buffer (0.05% v/v Tween-20 in PBS). The epitope displaying phage and controls were diluted to 1 nM in ChonBlock Blocking/Sample Dilution Buffer and 100 µL were added to each well before incubating for 2 h with shaking (150 rpm) at room temperature. The plate was then washed three times with wash buffer. The primary antibody, anti-M13-HRP (Creative Diagnostics), was diluted 1:5000 in ChonBlock Secondary Antibody Buffer and 100 µL was added per well; the plate was incubated for 1 h at 150 rpm and room temperature. Following three washes with wash buffer, 1-Step Ultra TMB-ELISA Substrate Solution (100 µL per well, ThermoScientific) was added. Absorbance of TMB substrate was measured twice at 652 nm by UV-Vis plate reader (BioTek) after 5 and 15 min of incubation.

#### Serum coronavirus antigen microarray (COVAM)

COVAM included 61 antigens across respiratory virus subtypes including 11 antigens from SARS-CoV-2 expressed in either baculovirus or HEK-293 cells as previously detailed (**Table S4**) (4). These antigens were provided by Sino Biological U.S. Inc. as either catalog products or custom synthesis service products. The antigens were printed onto microarrays, probed with human sera, and analyzed as previously described (45-47). Briefly, lyophilized antigens were reconstituted with sterile water to a concentration of 0.1 mg/mL protein in PBS, and printing buffer was added. Antigens were then printed onto ONCYTE AVID nitrocellulose-coated slides (Grace Bio-Labs) using an OmniGrid 100 microarray printer (GeneMachines). The microarray slides were probed with human sera diluted 1:100 in 1X Protein Array Blocking Buffer (GVS Life Sciences, Sanford, ME) overnight at 4°C and washed with TTBS buffer (20 mM Tris-HCl, 150 mM NaCl, 0.05% Tween-20 in ddH<sub>2</sub>O adjusted to pH 7.5 and filtered) three times for 5 mins each. A mixture of human IgG and IgA secondary antibodies conjugated to quantum dot fluorophores Q800 and Q585 respectively was applied to each of the microarray pads and incubated for 2 h at room temperature, and pads were then washed with TTBS three times for 5 mins each and dried. The slides were imaged using an ArrayCam imager (Grace Bio-Labs) to measure background-subtracted median spot fluorescence. Non-specific binding of secondary antibodies was subtracted using a saline control. The mean fluorescence of the 4 replicate spots for each antigen was used for analysis.

#### Statistical analysis

The ELISA data were analyzed in GraphPad Prism 8. Since the total antibody content differs from person to person, the raw absorbance values for every patient sample were normalized and represented as the ratio as compared to a negative control. Analysis of

variance (ANOVA) with Dunnett's multiple comparisons was performed to determine if values were statistically significant. Correlations between COVAM IgG/IgM and ELISA were determined by plotting normalized values on an XY graph and performing a non-parametric correlation analysis using a Spearman's rank correlation coefficient test.

For data visualization of clinical patient data, trends in data were evaluated using Knime Analytics Platform software. GraphPad Prism was used to calculate column statistics including mean, standard deviation, SEM, p-values, Odds Ratios, and Likelihood Ratios defined as sensitivity / (1 - specificity). ANOVA with Tukey's multiple comparisons test was used to evaluate antibody response and disease severity between patients with  $\alpha$ Ep9 Abs, non-Ep9,  $\alpha$ N Abs, or non  $\alpha$ N Abs. Comparisons of patients with  $\alpha$ Ep9 Abs and non- $\alpha$ Ep9 Abs were conducted using unpaired, two-tailed, parametric t-tests. Contingency graphs were statistically evaluated using Fisher's exact test, for groups with binary categorization, and Chi-squared test for groups with multiple categories. Different datasets were fitted with linear or non-linear regression methods, the fit with the higher  $R^2$  value was chosen. Correlations between two clinical parameters (e.g., IL-6 and AST) were evaluated using the Pearson coefficient or Spearman coefficients ( $r$ ) for linear or non-linear regressions, respectively;  $r$ -values between 1.0-0.7 were considered strong correlations,  $r$ -values between 0.7 and 0.5 were considered a moderate correlation, and values below 0.5 were considered a weak correlation (48). The significance of the correlation was evaluated based on  $p$ -value  $<0.05$ .

## Supplementary Text

**Table S1. Phage-displayed putative epitopes of SARS-CoV-2 and Ep9 orthologous sequences from SARS, MERS, HKU-1, and NL63.**

| Epitope | Virus      | Protein | Residues* | Amino Acid Sequence                                                                                                                                                                                                                  | Sequence Length | Ref. |
|---------|------------|---------|-----------|--------------------------------------------------------------------------------------------------------------------------------------------------------------------------------------------------------------------------------------|-----------------|------|
| Ep1     | SARS-CoV-2 | S       | 287-317   | DAVDCALDPLSETKCTLKSFTVEKGIYQTSN                                                                                                                                                                                                      | 31              | (13) |
| Ep2     | SARS-CoV-2 | S       | 802-819   | FSQILPDPSKPSKRSFIE                                                                                                                                                                                                                   | 18              | (13) |
| Ep3     | SARS-CoV-2 | S       | 15-30     | CVNLTTRTQLPPAYTN                                                                                                                                                                                                                     | 16              | (14) |
| Ep4     | SARS-CoV-2 | S       | 1056-1070 | APHGVVFLHVTYVPA                                                                                                                                                                                                                      | 15              | (12) |
| Ep5     | SARS-CoV-2 | M       | 1-24      | MADSNGTITVEELKLLQWNLVI                                                                                                                                                                                                               | 24              | (13) |
| Ep6     | SARS-CoV-2 | M       | 132-151   | PLLESELVIGAVILRGLRI                                                                                                                                                                                                                  | 20              | (13) |
| Ep7     | SARS-CoV-2 | M       | 97-11     | IASFRLFARTSRMWS                                                                                                                                                                                                                      | 15              | (12) |
| Ep8     | SARS-CoV-2 | N       | 41-61     | RPQGLPNNTASWFTALTQHGK                                                                                                                                                                                                                | 21              | (13) |
| Ep9     | SARS-CoV-2 | N       | 152-172   | ANNAIIVLQLPQGTTLKPGFY                                                                                                                                                                                                                | 21              | (13) |
| Ep10    | SARS-CoV-2 | N       | 264-278   | ATKAYNVTQAFGRRG                                                                                                                                                                                                                      | 15              | (12) |
| Ep11    | SARS-CoV-2 | E       | 52-66     | VKPSFYVYSRVKNLN                                                                                                                                                                                                                      | 15              | (12) |
| Ep12    | SARS-CoV-2 | S       | 524-598   | VCGPKKSTNLVKNKCVNFNFGTLTGTGVLTESNKKFLPFQQFGRDIAD<br>TTDAVRDPQTLEILDITPCSEFGGVSVI                                                                                                                                                     | 75              | (13) |
| Ep13    | SARS-CoV-2 | S       | 601-640   | GTNTSNQVAVLYQDVNCTEVPVAIHADQLTPTWRVYSTGS                                                                                                                                                                                             | 40              |      |
| Ep13*   | SARS-CoV-2 | S       | 601-640   | GTNTSNQVAVLYQGVNCTEVPVAIHADQLTPTWRVYSTGS                                                                                                                                                                                             | 40              | (49) |
| Ep14    | SARS-CoV-2 | S       | 61-76     | NVTWFHAIHVSQTNGT                                                                                                                                                                                                                     | 16              |      |
| Ep15    | SARS-CoV-2 | S       | 373-390   | SFSTFKCYGVSPTKLNDL                                                                                                                                                                                                                   | 18              |      |
| Ep16    | SARS-CoV-2 | N       | 354-400   | NKHIDAYKTFPPTEPKDKKKKADETTQALPQRQKQQTVTLTPAADL                                                                                                                                                                                       | 47              | (13) |
| Ep17    | SARS-CoV-2 | S       | 319-529   | RVQPTEIVRFPNITNLCPFGEVFNATRFASVYAWNRRKRISNCVADYS<br>VLYNSASFSTFKCYGVSPTKLNDLCFTNVYADSFVIRGDEVQRQIAPGQ<br>TGKIADYNYKLPDDFTGCVIAWNSNNLDSKVGNGYNYLYRLFRKSNLK<br>PFERDISTEIQAGSTPCNGVEGFNCYFPLQSYGFQPTNGVGYQPYRV<br>VVLSEFELLHAPATVCGPKK | 211             |      |
| Ep18    | SARS-CoV-2 | S       | 488-507   | CYFPLQSYGFQPTNGVGYQP                                                                                                                                                                                                                 | 20              |      |
| Ep19    | SARS-CoV-2 | S       | 429-448   | FTGCVIAWNSNNLDSKVGGN                                                                                                                                                                                                                 | 20              |      |
| Ep20    | SARS-CoV-2 | S       | 448-466   | NYNLYRLFRKSNLKPFER                                                                                                                                                                                                                   | 19              |      |
| Ep21    | SARS-CoV-2 | S       | 467-487   | DISTEIQAGSTPCNGVEGFN                                                                                                                                                                                                                 | 21              |      |
| sEp9    | SARS       | N       | 153-173   | NNNAATVLQLPQGTTLKPGFY                                                                                                                                                                                                                | 21              |      |
| mEp9    | MERS       | N       | 141-161   | NNNSAIVTQFAPGTKLPKNFH                                                                                                                                                                                                                | 21              |      |
| hEp9    | HKU-1      | N       | 166-186   | TTQEAIPTRFPPGTILPQGY                                                                                                                                                                                                                 | 21              |      |
| nEp9    | NL63       | N       | 119-136   | NQKPLEPKFSIALPPELS                                                                                                                                                                                                                   | 18              |      |

\*Residue numbering from protein sequences deposited in GenBank. Specifically, the accession numbers were as follows: S protein (YP\_009724390.1), M protein (YP\_009724393.1), N protein (YP\_009724397.2) and E protein (YP\_009724392.1) from SARS-CoV-2 and N protein from SARS (NP\_828855.1), MERS (YP\_009047211.1), HKU-1 (YP\_173242.1), or NL63 (YP\_003771.1).

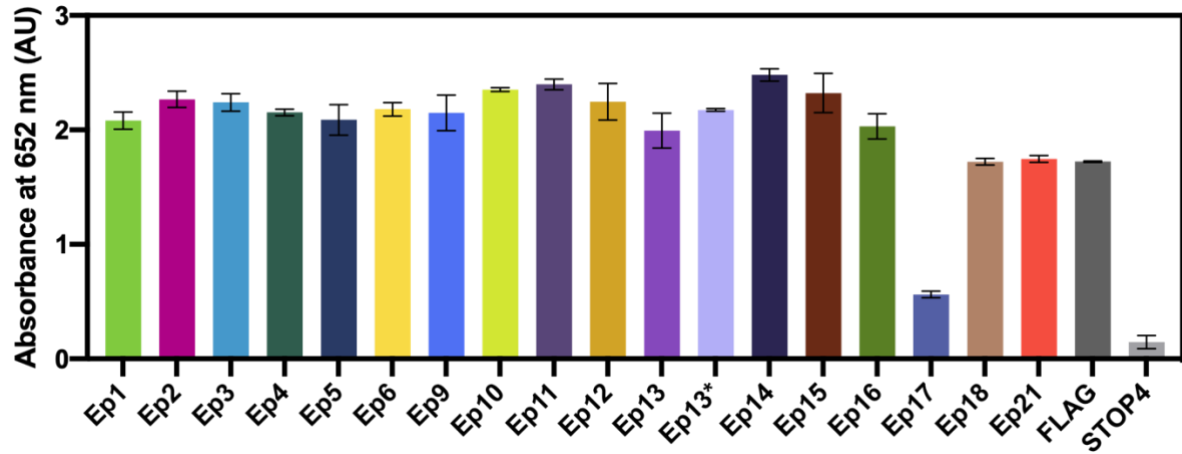

**Fig. S1. Quality control ELISA (QC ELISA) for phage-displayed, epitope candidates.** Anti-FLAG antibodies (1:1000 in coating buffer) were immobilized on a microtiter plate. Subsequent steps followed the ELISA protocol provided here. Error bars represent SEM (n = 3).

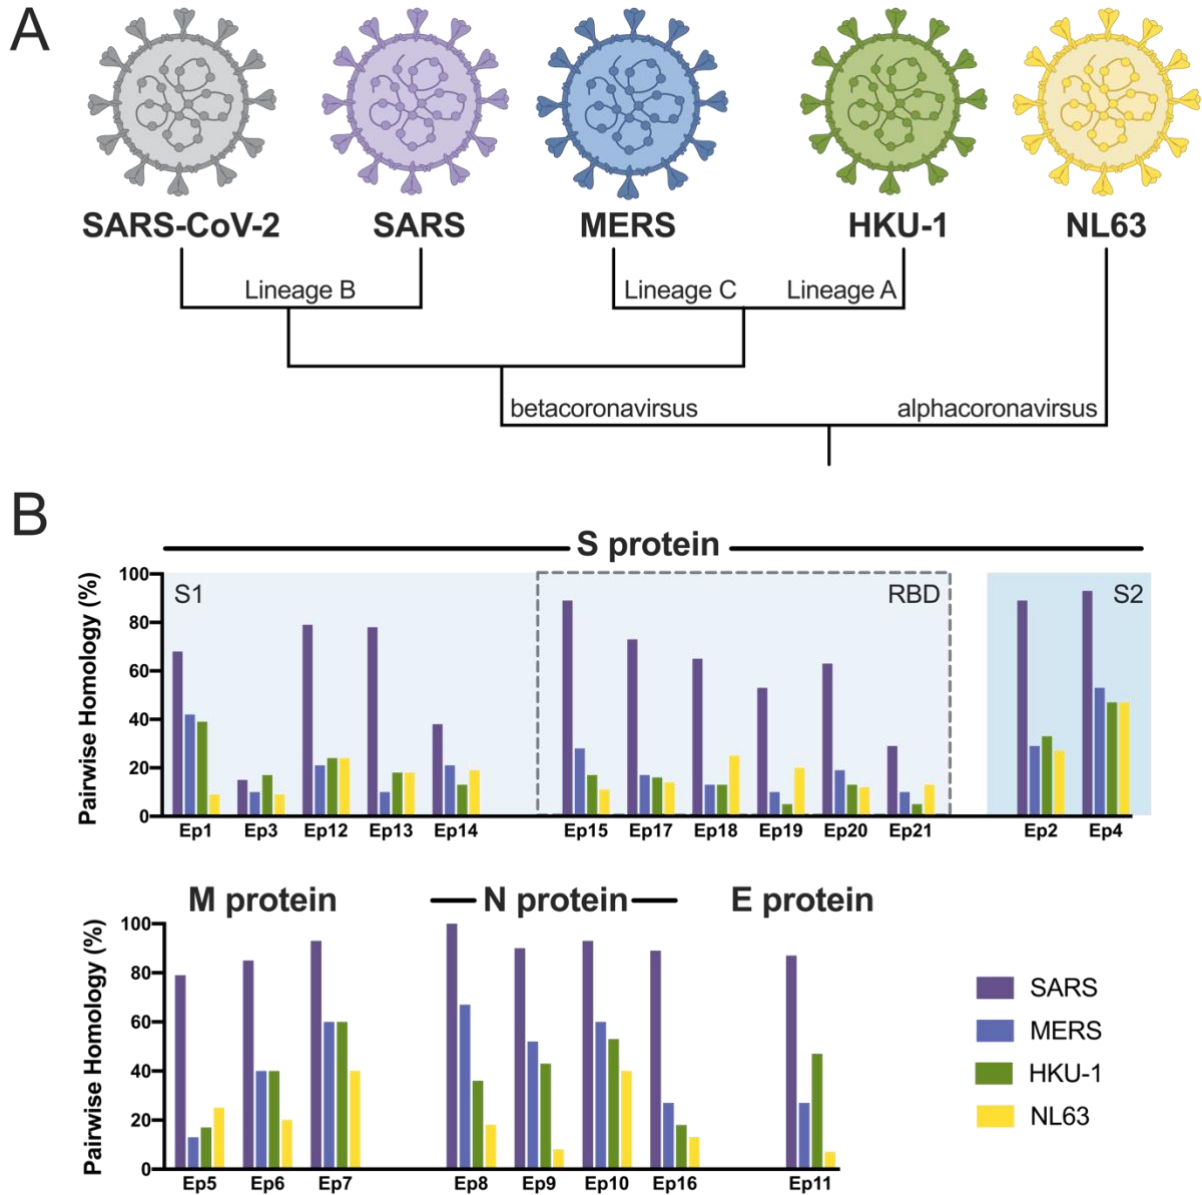

**Fig. S2. Epitope homology of SARS-CoV-2 with four phylogenetically related coronaviruses known to infect humans.** A) Evolutionary lineages of the human coronaviruses investigated here, including the highly pathogenic (SARS-CoV-2, SARS, and MERS) and the less virulent (HKU-1 and NL63). B) The pairwise homology (% amino acid identity) between SARS-CoV-2 and the indicated coronavirus. Labels (top) indicate the proteins and domains (e.g., S1) from which the epitopes are derived.



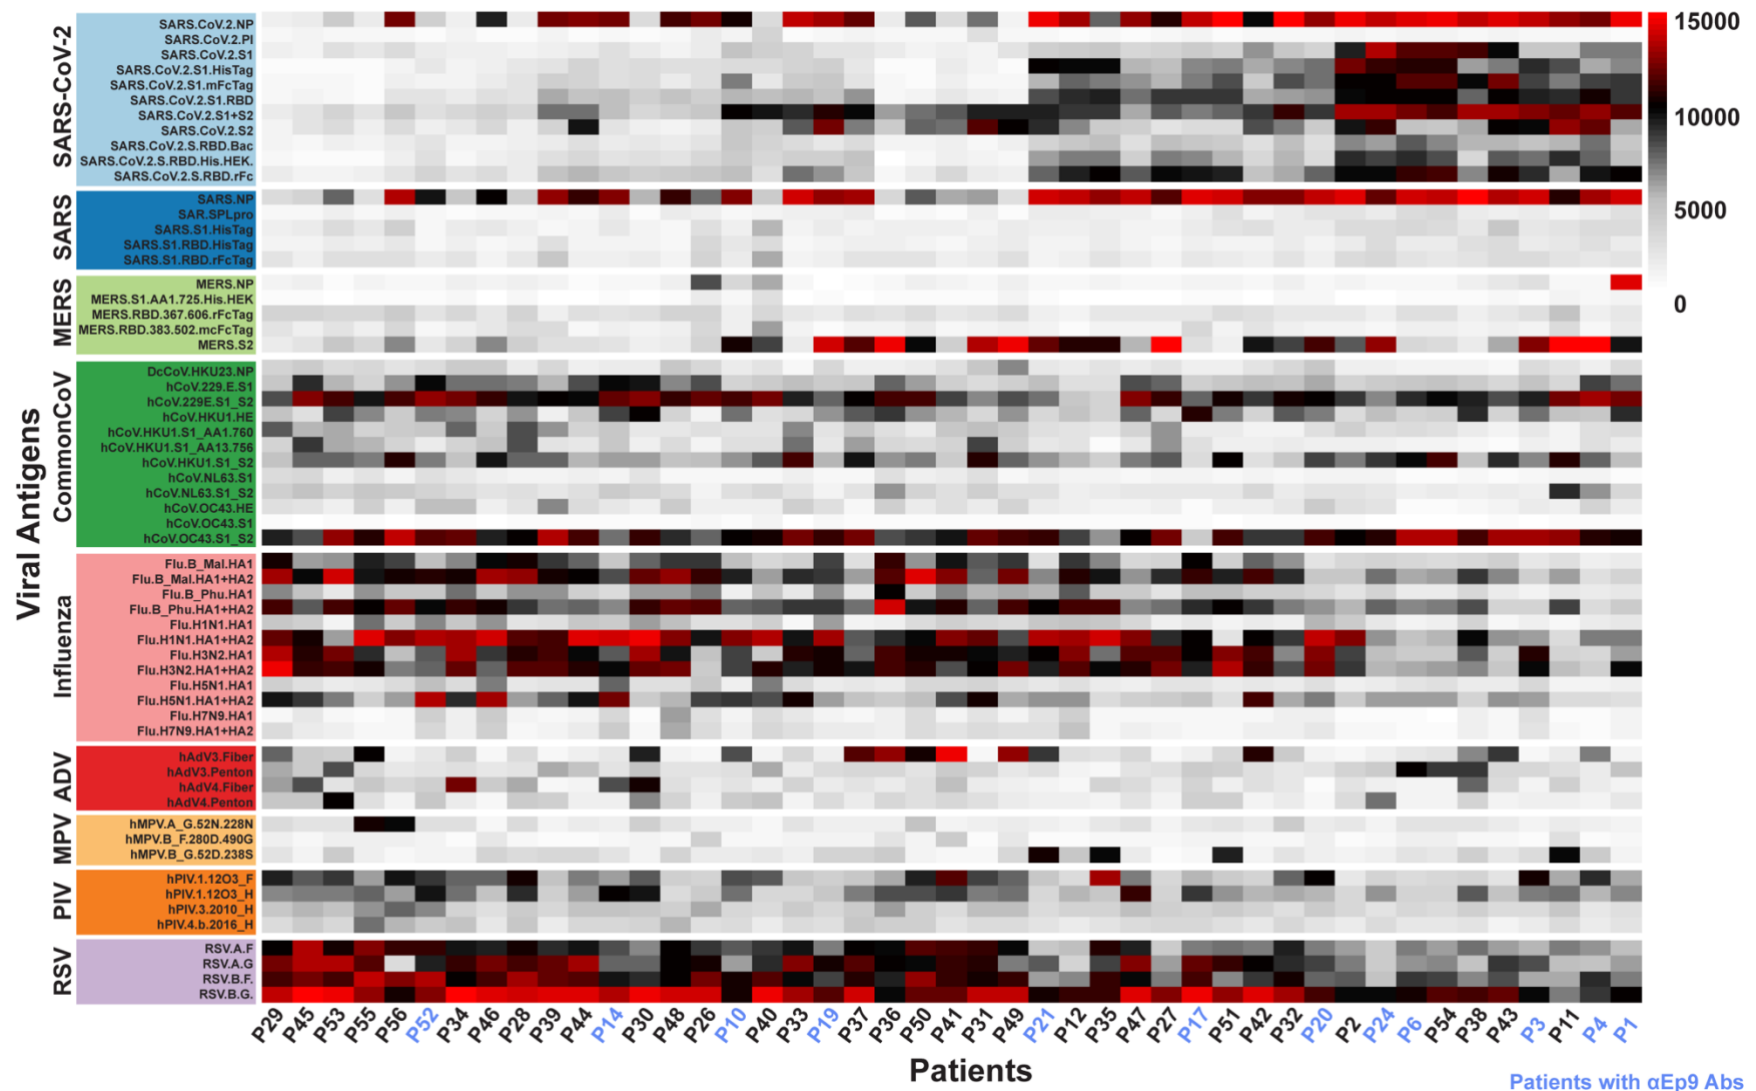

**Fig. S3. COVAM data showing the variation in IgG seroreactivity of patient plasma.** The heatmap shows normalized signal intensity from plasma samples ( $n = 45$ ). Plasma samples are in columns and sorted left to right by increasing average intensity to differentially reactive IgG, and viruses are in rows sorted by decreasing average seroreactivity.

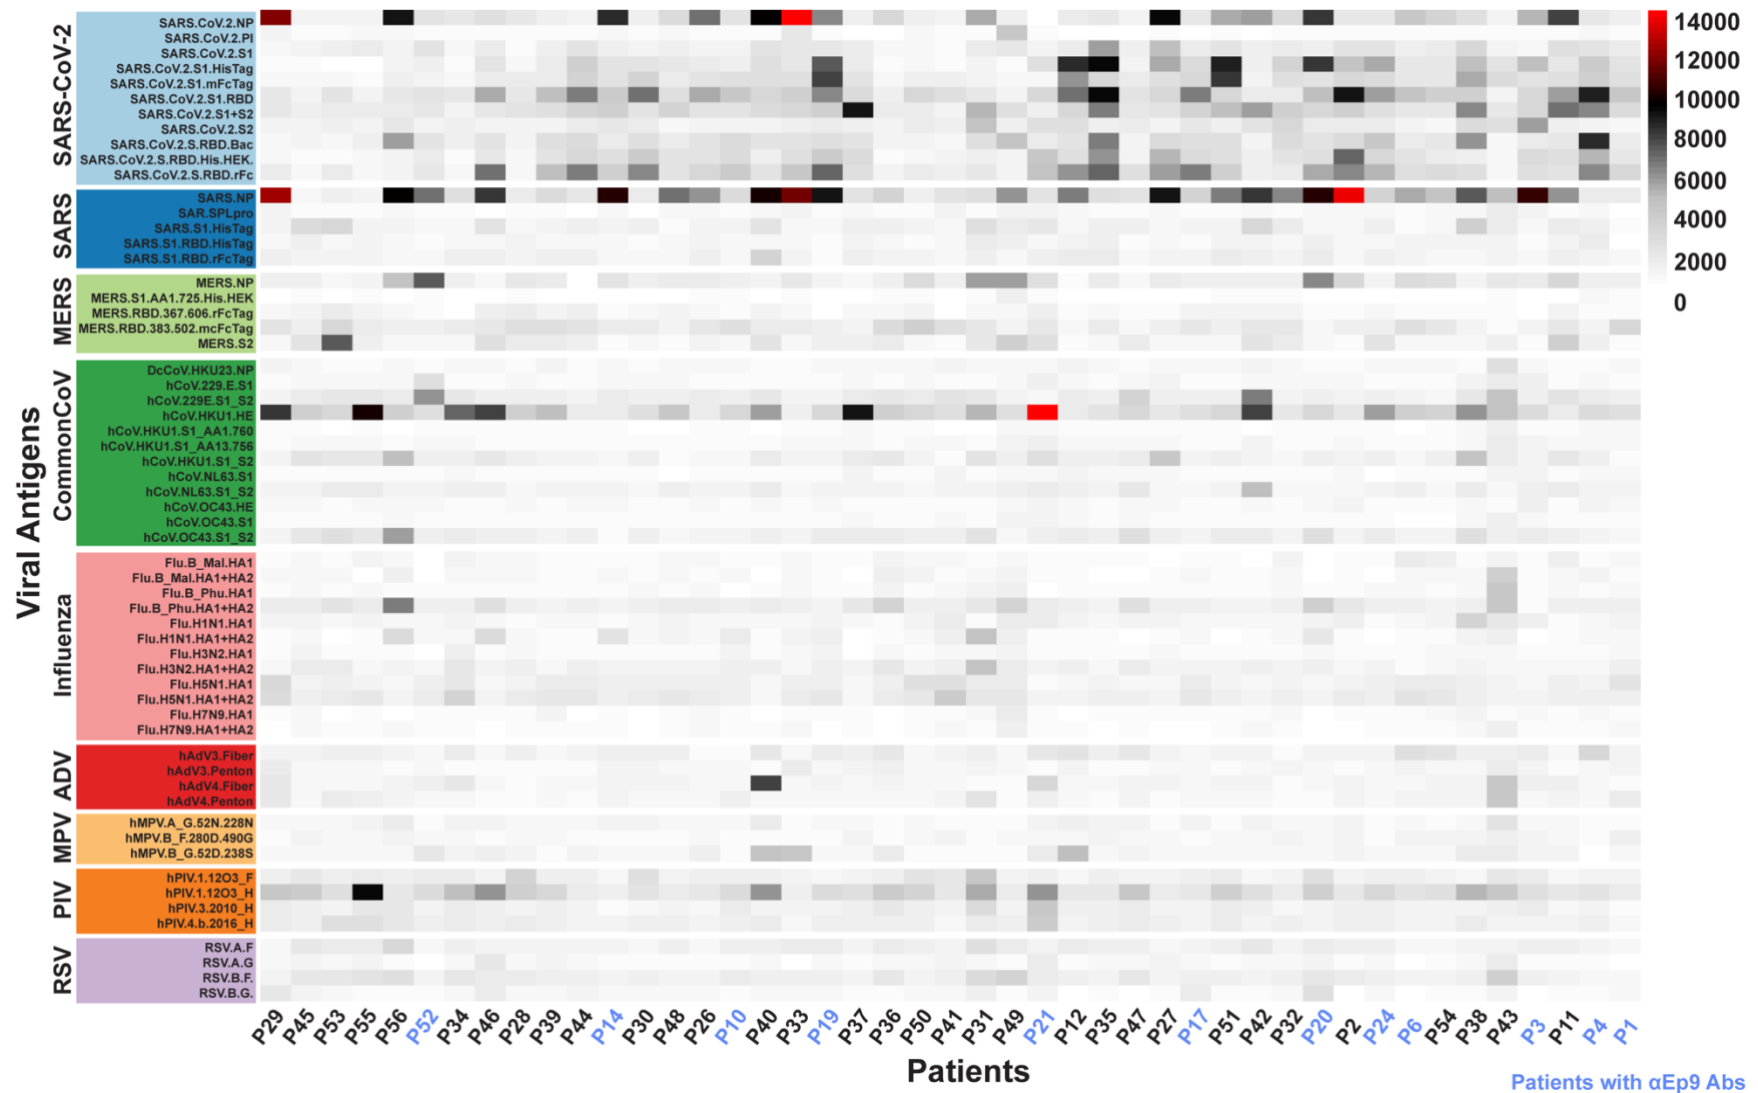

**Fig. S4. Variation in IgM seroreactivity of patient plasma.** Heatmap showing normalized signal intensity from plasma samples (n = 45). Plasma samples are in columns and sorted left to right by increasing average intensity to differentially reactive IgM, and viruses are in rows sorted by decreasing average seroreactivity.

**Table. S2. Demographics and clinical characteristics of COVID-19 patients categorized by  $\alpha$ Ep9 Abs response.**

| Characteristics                                             | No $\alpha$ Ep9 Abs (n=63)      | $\alpha$ Ep9 Abs (n=23)      | p-value  |
|-------------------------------------------------------------|---------------------------------|------------------------------|----------|
| <b>Demographics</b>                                         |                                 |                              |          |
| Age ( $\pm$ SD)                                             | 49.75 ( $\pm$ 18.45)            | 47.26 ( $\pm$ 18.45)         | 0.5668   |
| Gender F: M (%)                                             | 21:42 (44.4/66.7)               | 10:13 (43.5/56.5)            | 0.4502   |
| Ethnicity n, (%)                                            | 15 (65.2): 4 (17.4):            | 39 (61.9): 8 (12.7):         | 0.7760   |
| (Hispanic: Asian: Caucasian: Black: Other)                  | 3 (13.0): 1 (4.3): 0 (0)        | 9 (14.3) :3 (4.8) :4 (6.3)   |          |
| BMI ( $\pm$ SD)                                             | 28.89 ( $\pm$ 6.445)            | 32.06 ( $\pm$ 7.896)         | 0.0642   |
| <b>Preconditions, n (%)</b>                                 |                                 |                              |          |
| Hypertension                                                | 23 (36.5)                       | 10 (43.5)                    | 0.6203   |
| Diabetes                                                    | 21 (33.3)                       | 6 (26.1)                     | 0.6065   |
| CVD                                                         | 6 (9.5)                         | 2 (8.7)                      | 1.0000   |
| CAD                                                         | 6 (9.5)                         | 2 (8.7)                      | 1.0000   |
| CKD/ESRD                                                    | 6 (9.5)                         | 2 (8.7)                      | 1.0000   |
| Asthma/COPD                                                 | 8 (12.7)                        | 3 (13.0)                     | 1.0000   |
| Obesity                                                     | 24 (38.1)                       | 13 (56.5)                    | 0.1461   |
| Cancer                                                      | 2 (3.17)                        | 3 (13.0)                     | 0.1163   |
| <b>Symptoms, n (%)</b>                                      |                                 |                              |          |
| Total Days of Symptoms                                      | 9.8 ( $\pm$ 8.98)               | 17 ( $\pm$ 10.13)            | 0.0059** |
| Cough                                                       | 43 (68.3)                       | 15 (65.2)                    | 0.7997   |
| Dyspnea/SOB                                                 | 28 (44.4)                       | 11 (47.8)                    | 0.8108   |
| Myalgia/Fatigue                                             | 17 (27.0)                       | 8 (34.8)                     | 0.5926   |
| Headache                                                    | 12 (19.0)                       | 2 (8.7)                      | 0.3349   |
| Chest pain                                                  | 7 (11.1)                        | 3 (13.0)                     | 1.0000   |
| Anosmia                                                     | 4 (6.3)                         | 2 (8.7)                      | 0.6561   |
| Stroke-like Symptoms                                        | 0                               | 2 (8.7)                      | 0.0692   |
| Abdominal pain                                              | 3 (4.8)                         | 0                            | 0.5611   |
| Pulmonary symptoms <sup>^</sup><br>(Pneumonia: Other: None) | 16 (25.4): 36 (52.38): 8 (12.7) | 13 (56.5): 7 (30.4): 1 (4.3) | 0.0142*  |
| <b>Severity, n (%)</b>                                      |                                 |                              |          |
| Asymptomatic                                                | 3                               | 0                            | 0.5611   |
| Non-severe: Severe <sup>^^</sup>                            | 51:12 (n, severity 19.0%)       | 10:13 (n, severity 56.5%)    | 0.0013** |
| Days in Hospital                                            | 5.79 ( $\pm$ 8.01)              | 10.95 ( $\pm$ 10.74)         | 0.0183*  |
| Days in ICU                                                 | 12.63 ( $\pm$ 13.19) n=11       | 12.50 ( $\pm$ 6.93), n=12    | 0.8004   |
| Days on ventilator                                          | 14.00( $\pm$ 3.96), n=6         | 12.86 ( $\pm$ 5.40), n=7     | 0.7934   |

Results are presented as mean  $\pm$  standard deviation (SD) or patient number (n) and percentage of population (%). P-values for continuous variables are calculated using unpaired, two-tailed T-tests. P-values for categorical variables use Fisher's exact test for single value parameters, and Chi-squared test for multi-group variables. \*, \*\* p-values < 0.05, 0.01, respectively.

<sup>^</sup> Pulmonary symptoms are based descriptive reports of X-ray and CT scans. "Other" pulmonary symptoms include, but are not limited to, atelectasis, pleural scarring, pleural effusion, pulmonary edema, mild peribronchial thickening.

<sup>^^</sup> non-severe include ER and In-patients only, severe includes patients in the ICU, on the ventilator or death.

BMI = body mass index, CVD = cardiovascular disease, CAD = coronary artery disease, CKD = chronic kidney disease, ESRD = end-stage renal disease, SOB = shortness of breath, COPD = chronic obstructive pulmonary disease

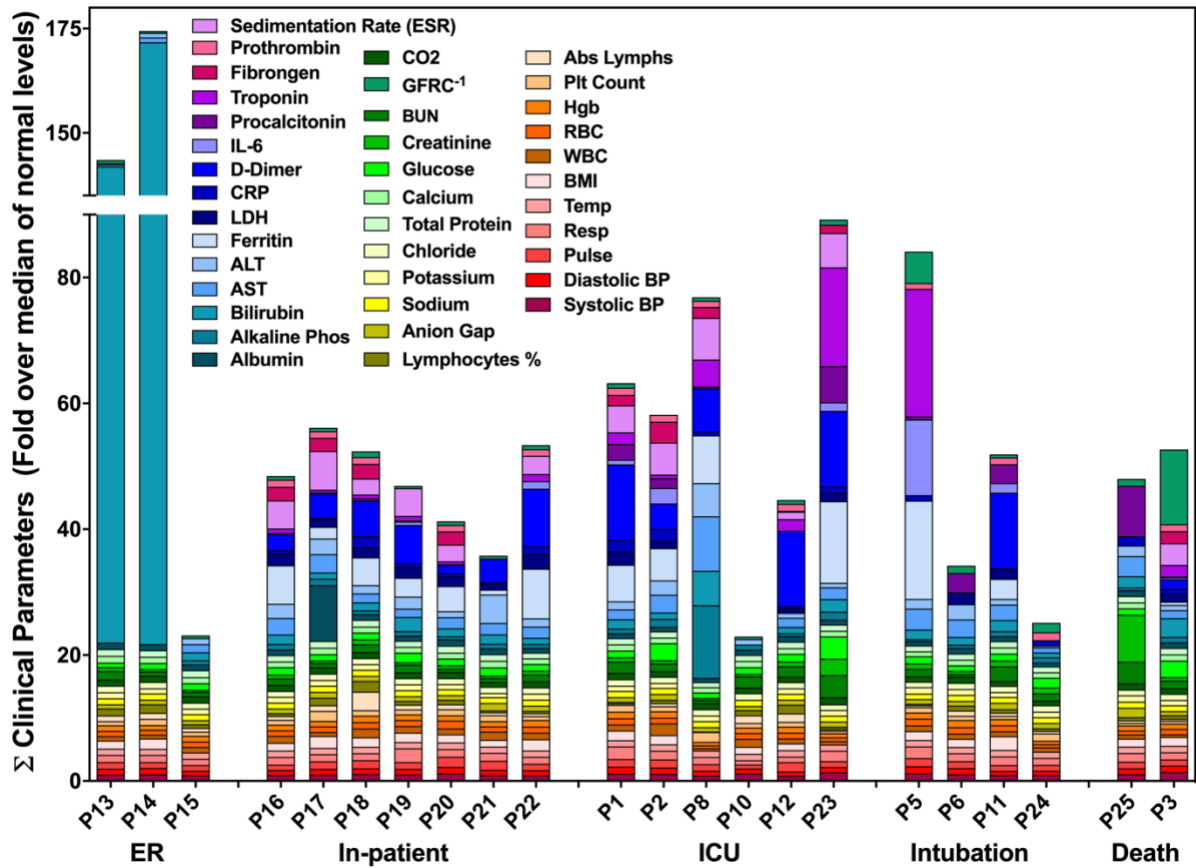

**Fig. S5. Comparison of disease severity and clinical parameters of patients with  $\alpha$ Ep9 Abs.** The data shown represents the fold change of each clinical parameter over the mean of the normal range. The sum of all the fold changes of the clinical parameters for each Ep9-responsive patient is binned according to COVID-19 disease severity. For facile visualization and comparison of clinical biomarkers between Ep9-reponsive patients, the values of each parameter were normalized to fold over the mean of healthy values. No significant trends in clinical parameters (color indicated) were observed with increased disease severity or relative to patients lacking  $\alpha$ Ep9 Abs.

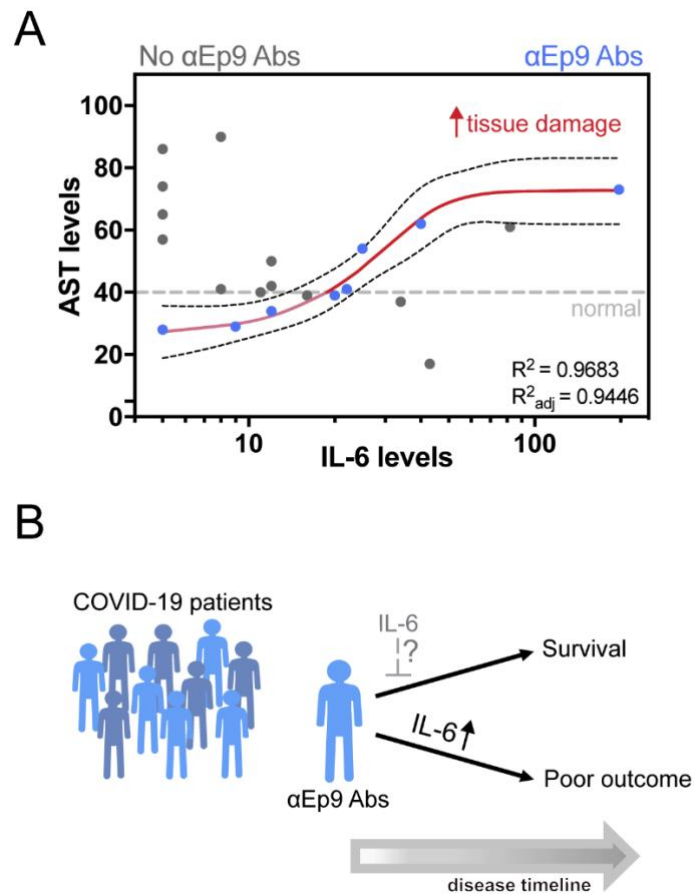

**Fig. S6. Association of COVID-19 patients having  $\alpha$ Ep9 Abs with inflammatory cytokine and tissue damage markers. A)** Association between the inflammatory cytokine, IL-6, and the tissue damage marker, aspartate transaminase (AST), shows a sigmoidal curve fit for patients with  $\alpha$ Ep9 Abs,  $R^2 = 0.9683$ , Spearman's correlation coefficient = 1.0,  $p < 0.0001$ . **B)** Schematic of patients with  $\alpha$ Ep9 Abs with increasing IL-6 levels leading to poor outcomes. We hypothesize patients with  $\alpha$ Ep9 Abs could benefit from IL-6 inhibition early in the disease, such as monoclonal antibody drugs targeting IL-6 or its receptor (IL6R), to disrupt a cytokine storm and reduce severe outcomes.

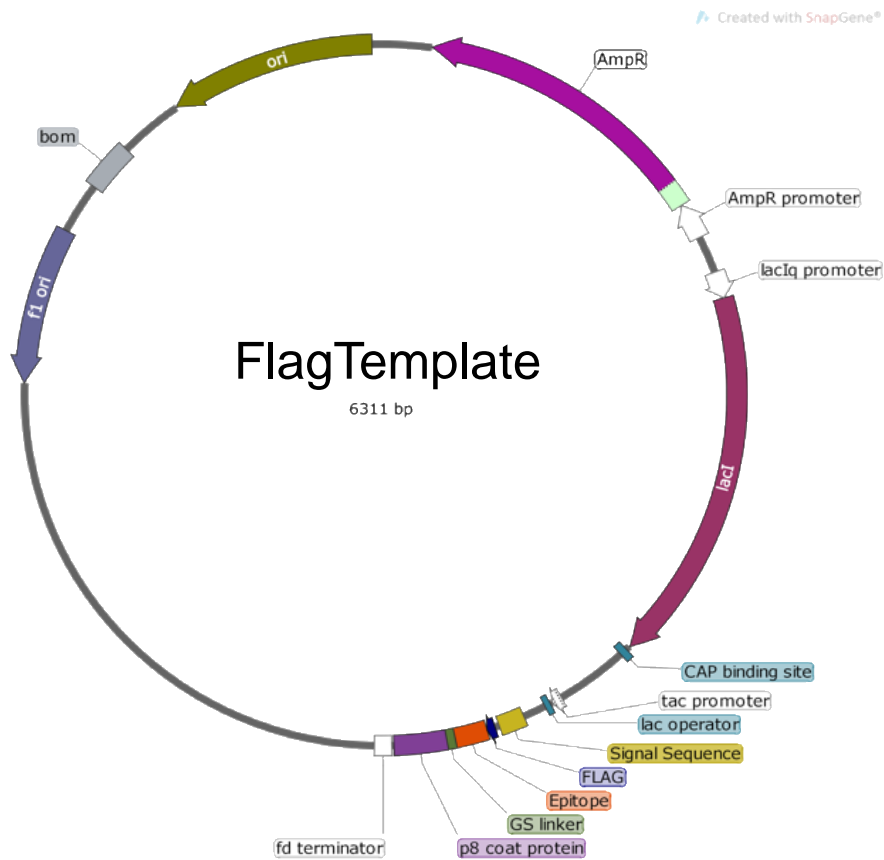

**Fig. S7. Schematic of the FlagTemplate phagemid used for cloning phage-displayed epitopes.** The phagemid, termed FlagTemplate, for the subcloning of SARS-CoV-2, SARS, HKU-1 and NL63 epitopes encodes an N-terminal FLAG tag, followed by a GSG linker to the epitope before a C-terminal GGGSGSSS linker to the P8 coat protein of M13-phage.

**Table S3. Oligos used for cloning of phage-displayed putative epitope for SARS-CoV-2 and ortholog Ep9 epitope from SARS, MERS, HKU-1, and NL63.**

| Oligo#  | Sequence (5' to 3') with insertions denoted in lowercase and substitutions in bold         | Product      | Mutagenesis | Rounds |
|---------|--------------------------------------------------------------------------------------------|--------------|-------------|--------|
| Oligo1  | aggaagtggaggtggaggatccgggagctccagc <b>CCGAGGGT</b> GACGATCCCG                              | FlagTemplate | Q5          | 1      |
| Oligo2  | ttatcatcgatctttataatcaaccaatgcata <b>GCCGAGGCGG</b> AAAAACATC                              |              |             |        |
| Oligo3  | attaaagtcggtcaccgtcgaaaaaggaatctatcagaccttaac <b>GGTGGAGGATCCGGGAGC</b>                    | Ep1          | Q5          | 1      |
| Oligo4  | gtacactttgttactcagtgatctaatgcacaatcgaccgcatc <b>TTTATCATCGTCATCTTTATAATCAACCAATGC</b>      |              |             |        |
| Oligo5  | gagcaagcctctaagcgctcttcattgaa <b>GGTGGAGGATCCGGGAGC</b>                                    | Ep2          | Q5          | 1      |
| Oligo6  | gggtcaggcaggatctgcgagaatccacttc <b>TTTATCATCGTCATCTTTATAATCAACCAATGC</b>                   |              |             |        |
| Oligo7  | tacacagttacctcccgcgtatacaaat <b>GGTGGAGGATCCGGGAGC</b>                                     | Ep3          | Q5          | 1      |
| Oligo8  | cgagttgcaagttcacacatccacttc <b>TTTATCATCGTCATCTTTATAATCAACCAATGC</b>                       |              |             |        |
| Oligo9  | ttctgcacgtgacgtatgtgcctgct <b>GGTGGAGGATCCGGGAGC</b>                                       | Ep4          | Q5          | 1      |
| Oligo10 | caccactccatggggcgctccacttc <b>TTTATCATCGTCATCTTTATAATCAACCAATGC</b>                        |              |             |        |
| Oligo11 | ggagctgaaaaaactgttgaacaatggaacctgtaac <b>GGTGGAGGATCCGGGAGC</b>                            | Ep5          | Q5          | 1      |
| Oligo12 | tctacgtaatcgatccggttcgagtcgccattccacttc <b>TTTATCATCGTCATCTTTATAATCAACCAATGC</b>           |              |             |        |
| Oligo13 | tggagctgtgatcttacgcggacacctgctatc <b>GGTGGAGGATCCGGGAGC</b>                                | Ep6          | Q5          | 1      |
| Oligo14 | atcactaattctgattcaacaggggtccacttc <b>TTTATCATCGTCATCTTTATAATCAACCAATGC</b>                 |              |             |        |
| Oligo15 | ttcgcacgcactcgctccatgtggtct <b>GGTGGAGGATCCGGGAGC</b>                                      | Ep7          | Q5          | 1      |
| Oligo16 | caagcgggaagctcgcaatccacttc <b>TTTATCATCGTCATCTTTATAATCAACCAATGC</b>                        |              |             |        |
| Oligo17 | gctcgtgttactcgcgttacccagcacgaaag <b>GGTGGAGGATCCGGGAGC</b>                                 | Ep8          | Q5          | 1      |
| Oligo18 | tgtattattaggcagccctgagggcgctccacttc <b>TTTATCATCGTCATCTTTATAATCAACCAATGC</b>               |              |             |        |
| Oligo19 | tcaagggactacctgccaaggggttctat <b>GGTGGAGGATCCGGGAGC</b>                                    | Ep9          | Q5          | 1      |
| Oligo20 | ggtaattgtaacacgattgcagcgttattagc <b>TCCACTTCTTTATCATCGTCATCTTTATAATC</b>                   |              |             |        |
| Oligo21 | gtaaccaagcgttcggtcgcgcggg <b>GGTGGAGGATCCGGGAGC</b>                                        | Ep10         | Q5          | 1      |
| Oligo22 | attatacgcttttagctccacttc <b>TTTATCATCGTCATCTTTATAATCAACCAATGC</b>                          |              |             |        |
| Oligo23 | gtctactctcgtgtaaaaaactgaa <b>GGTGGAGGATCCGGGAGC</b>                                        | Ep11         | Q5          | 1      |
| Oligo24 | gtaaaaggaaggctcactccacttc <b>TTTATCATCGTCATCTTTATAATCAACCAATGC</b>                         |              |             |        |
| Oligo25 | ttcaactttaatgacctgacgggaccggagtcctgactgaatcaat <b>GGTGGAGGATCCGGGAGC</b>                   | Ep12         | Q5          | 3      |
| Oligo26 | ttgacacactattttaaccaggtttgtgactcttcgcccgcatac <b>TTTATCATCGTCATCTTTATAATCAA</b><br>CCAATGC |              |             |        |
| Oligo27 | agacgctgttcgtagccacagactctggagattttgacattcacct <b>GGTGGAGGATCCGGGAGC</b>                   |              |             |        |
| Oligo28 | gttgatcggcgatgtcgcgtccaaattgctggaacggcagaaat <b>ATTGGATT</b> CAGTCAGGACTCCG                |              |             |        |
| Oligo29 | tgtctccgtcatc <b>GGTGGAGGATCCGGGAGC</b>                                                    |              |             |        |
| Oligo30 | cctccgaatgaaca <b>AGGTGTAATGTCCAAAATCTCCAGAG</b>                                           |              |             |        |
| Oligo31 | ctgtatcaggatgtcaattgcacagaagtc <b>GGTGGAGGATCCGGGAGC</b>                                   | Ep13         | Q5          | 2      |
| Oligo32 | tacagcaacttggtactgtgtttgtccc <b>TTTATCATCGTCATCTTTATAATCAACCAATGC</b>                      |              |             |        |
| Oligo33 | cccacttgccgctctacagcacaggcag <b>GGTGGAGGATCCGGGAGC</b>                                     |              |             |        |
| Oligo34 | cgtcagttggctcggcgtgatggctaccgg <b>GACTTCTGTGCAATTGACATCCTGATAC</b>                         |              |             |        |
| Oligo35 | GCTGTACCAG <b>ggc</b> GTGAACTGTA                                                           | Ep13*        | Q5          | 1      |
| Oligo36 | ACTGCCACCTGATTGCTG                                                                         |              |             |        |
| Oligo37 | tatccacgtatcgggtacgaatggaacg <b>GGTGGAGGATCCGGGAGC</b>                                     | Ep14         | Q5          | 1      |
| Oligo38 | gcgtggaaccacgtcacattccacttc <b>TTTATCATCGTCATCTTTATAATCAACCAATGC</b>                       |              |             |        |
| Oligo39 | tggagtgctcccactaaatgaacgacct <b>GGTGGAGGATCCGGGAGC</b>                                     | Ep15         | Q5          | 1      |
| Oligo40 | tagcattggaaggtgagaacgatccacttc <b>TTTATCATCGTCATCTTTATAATCAACCAATGC</b>                    |              |             |        |
| Oligo41 | tccccgacggagccgaagaaggataagaaaaaaaa <b>GGTGGAGGATCCGGGAGC</b>                              | Ep16         | Q5          | 2      |
| Oligo42 | aaggttttatacgcataatgtgtttattccacttc <b>TTTATCATCGTCATCTTTATAATCAACCAATGC</b>               |              |             |        |
| Oligo43 | actccacaggaacgacactgccaagggatt <b>GGTGGAGGATCCGGGAGC</b>                                   |              |             |        |
| Oligo44 | tgcagtacagtgccagcattgttattccacttc <b>TTTATCATCGTCATCTTTATAATCAACCAATGC</b>                 |              |             |        |

|         |                                                                     |            |    |   |
|---------|---------------------------------------------------------------------|------------|----|---|
| Oligo45 | GGTGGAGGATCCGGGAGCTCCAGC                                            | GA Vector  | -  | - |
| Oligo46 | TTTATCATCGTCATCTTTATAATCAACCAATGCATAAGCCGAGGC                       |            |    |   |
| Oligo47 | CTGTATGTGGGCCAAAAAAGGGTGGAGGATCCGGGAGCTC                            | Ep17       | GA |   |
| Oligo48 | GGCTGTACGCGTCCACTTCCTTTATCATCGTCATCTTTATAATCAACCAATGCATAAG          |            |    |   |
| Oligo49 | ACGATGATAAAGGAAGTGGACGCGTACAGCCCACTGAAAG                            |            |    |   |
| Oligo50 | GAGCTCCCGGATCCTCCACCCTTTTTGGGCCACATACAGTCG                          |            |    |   |
| Oligo51 | caaccgacaaatggtgtgggttaccagccgGGTGGAGGATCCGGGAGC                    | Ep18       | Q5 | 1 |
| Oligo52 | gaaaccatagactgcaagggaaaataacaTCCACTTCCTTTATCATCGTCATCTTTATAATC      |            |    |   |
| Oligo53 | taataactggattccaagtaggagcGGTGGAGGATCCGGGAGC                         | Ep19       | Q5 | 1 |
| Oligo54 | gaattccaggaataacacaccagtgaaTCCACTTCCTTTATCATCGTCATCTTTATAATC        |            |    |   |
| Oligo55 | gaaatctaactgaaaccgttgaaaggGGTGGAGGATCCGGGAGC                        | Ep20       | Q5 | 1 |
| Oligo56 | cggaaaagcctgtaagatagttgtaattTCCACTTCCTTTATCATCGTCATCTTTATAATC       |            |    |   |
| Oligo57 | cacgcctgcaatgggtagagggtttaaatGGTGGAGGATCCGGGAGC                     | Ep21       | Q5 | 1 |
| Oligo58 | gaccctgcctgtagatctccgttgagatgtcTCCACTTCCTTTATCATCGTCATCTTTATAATC    |            |    |   |
| Oligo59 | caaccgacaaatggtgtgggttaccagccgGGTGGAGGATCCGGGAGC                    | Ep22       | Q5 | 1 |
| Oligo60 | gaaaccatagactgcaagggaaaataacaTCCACTTCCTTTATCATCGTCATCTTTATAATC      |            |    |   |
| Oligo61 | actccacaggaacgacactgccaagggattGGTGGAGGATCCGGGAGC                    | sEp9       | Q5 | 1 |
| Oligo62 | tgcaatcagtgagcagcattgttattccacttccTTTATCATCGTCATCTTTATAATCAACCAATGC |            |    |   |
| Oligo63 | tccgggtacaaagttaccaagaactccacGGTGGAGGATCCGGGAGC                     | mEp9       | Q5 | 1 |
| Oligo64 | gcaaattgagtaactatcgctgaatcattgtTCCACTTCCTTTATCATCGTCATCTTTATAATC    |            |    |   |
| Oligo65 | tcccgaactatttaccccaaggatactatGGTGGAGGATCCGGGAGC                     | hEp9       | Q5 | 1 |
| Oligo66 | gggaatctagtgggaatcgccctcctgagtagtTCCACTTCCTTTATCATCGTCATCTTTATAATC  |            |    |   |
| Oligo67 | agtattgcctgccacctgagttatctGGTGGAGGATCCGGGAGC                        | nEp9       | Q5 | 1 |
| Oligo68 | aaattcgggtcaagcggcctttgattTCCACTTCCTTTATCATCGTCATCTTTATAATC         |            |    |   |
| Oligo69 | TTTTGCGCCGACATCATAACGGTTCT                                          | pm1165a_P8 | -  | - |
| Oligo70 | TATGGGGTTTTGCTAAACAACCTTTCAACAG                                     |            |    |   |

List of oligos used in Q5 site-directed mutagenesis (Q5) or Gibson Assembly (GA) for the cloning of putative epitopes Ep1-22 for phage display. For epitope constructs between 100-210 bp in length, multiple rounds of Q5 were denoted.



**Table. S4. Antigens used in the COVAM experiment.**

| <b>Virus</b> | <b>Subtype</b> | <b>Strain</b> | <b>Protein</b> | <b>Gen Bank</b> | <b>Expression</b> | <b>Construct</b>      | <b>Source</b> | <b>Cat. #</b> |
|--------------|----------------|---------------|----------------|-----------------|-------------------|-----------------------|---------------|---------------|
| CoV          | Beta           | SARS-CoV-2    | N              |                 | Baculovirus       | N-(AA)-His-C          | Sino          | 40588-V08B    |
| CoV          | Beta           | SARS-CoV-2    | S1-RBD         |                 | HEK293            | N-(AA)-mFc-C          | Sino          | 40592-V05H    |
| CoV          | Beta           | SARS-CoV-2    | S1             |                 | HEK293            | N-(AA)-His-C          | Sino          | 40591-V08H    |
| CoV          | Beta           | SARS-CoV-2    | S1             |                 | HEK293            | N-(AA)-mFc-C          | Sino          | 40591-V02H    |
| CoV          | Beta           | SARS-CoV-2    | S1             |                 | HEK293            | N-(AA)-Fc-C           | Sino          | 40591-V05H1   |
| CoV          | Beta           | SARS-CoV-2    | S2             |                 | Baculovirus       | N-(AA)-His-C          | Sino          | 40590-V08B    |
| CoV          | Beta           | SARS-CoV-2    | S1+S2          |                 | Baculovirus       | N-(AA)-His-C          | Sino          | 40589-V08B1   |
| CoV          | Beta           | SARS          | PLpro          | AAX16193.1      | E. coli           | N-(AA1541-1859)-His-C | Sino          | 40524-V08E    |
| CoV          | Beta           | SARS          | S1-RBD         | AAX16192.1      | Baculovirus       | N-(AA306-527)-Fc-C    | Sino          | 40150-V31B2   |
| CoV          | Beta           | SARS          | S1-RBD         | AAX16192.1      | Baculovirus       | N-(AA306-527)-His-C   | Sino          | 40150-V08B2   |
| CoV          | Beta           | SARS          | S1             | AAX16192.1      | Baculovirus       | N-(AA1-667)-His-C     | Sino          | 40150-V08B1   |
| CoV          | Beta           | SARS          | N              | NP_828858.1     | Baculovirus       | N-(AA1-422)-His-C     | Sino          | 40143-V08B    |
| CoV          | Beta           | MERS          | N              | AFS88943.1      | Baculovirus       | N-(AA1-413)-His-C     | Sino          | 40068-V08B    |
| CoV          | Beta           | MERS          | S1-RBD         | AFS88936.1      | Baculovirus       | N-(AA383-502)-Fc-C    | Sino          | 40071-V05B    |
| CoV          | Beta           | MERS          | S1-RBD         | AFS88936.1      | Baculovirus       | N-(AA383-502)-rFc-C   | Sino          | 40071-V31B    |
| CoV          | Beta           | MERS          | S1-RBD         | AFS88936.1      | Baculovirus       | N-(AA367-606)-rFc-C   | Sino          | 40071-V31B1   |
| CoV          | Beta           | MERS          | S1-RBD         | AFS88936.1      | Baculovirus       | N-(AA367-606)-His-C   | Sino          | 40071-V08B1   |
| CoV          | Beta           | MERS          | S1             | AFS88936.1      | HEK293            | N-(AA1-725)-His-C     | Sino          | 40069-V08H    |
| CoV          | Beta           | MERS          | S1             | AFS88936.1      | Baculovirus       | N-(AA1-725)-His-C     | Sino          | 40069-V08B1   |
| CoV          | Beta           | MERS          | S1+S2          | AFS88936.1      | Baculovirus       | N-(AA1-1297)-His-C    | Sino          | 40069-V08B    |
| CoV          | Beta           | MERS          | S2             | AFS88936.1      | Baculovirus       | N-(AA726-1296)-His-C  | Sino          | 40070-V08B    |
| CoV          | Alpha          | NL63          | S1             | A0A1L2YVI8      | HEK293            | N-(AA19-717)-His-C    | Sino          | 40600-V08H    |
| CoV          | Alpha          | NL63          | S1+S2          | A0A1L2YVI8      | Baculovirus       | N-(AA19-1296)-His-C   | Sino          | 40604-V08B    |
| CoV          | Alpha          | 229E          | S1             | A0A1L7B942      | HEK293            | N-(AA16-536)-His-C    | Sino          | 40601-v08H    |
| CoV          | Alpha          | 229E          | S1+S2          | A0A1L7B942      | Baculovirus       | N-(AA16-1115)-His-C   | Sino          | 40605-V08B    |
| CoV          | Beta           | HKU-1         | S1             | YP_173238.1     | HEK293            | N-(AA1-760)-His-C     | Sino          | 40021-V08H    |
| CoV          | Beta           | HKU-1         | S1             | Q0ZME7          | HEK293            | N-(AA13-756)-His-C    | Sino          | 40602-V08H    |
| CoV          | Beta           | HKU-1         | S1+S2          | Q0ZME7          | Baculovirus       | N-(AA13-1295)-His-C   | Sino          | 40606-V08B    |
| CoV          | Beta           | HKU-1         | HE             | Q0ZME7          | HEK293            | N-(AA16-394)-His-C    | Sino          | Custom        |
| CoV          | Beta           | HKU23-368F    | N              | AHN64796.1      | HEK293            | N-(AA1-448)-His-C     | Sino          | 40458-V08B    |
| CoV          | Beta           | OC43          | S1             | AVR40344.1      | HEK293            | N-(AA13-533)-His-C    | Sino          | Custom        |
| CoV          | Beta           | OC43          | S1+S2          | AVR40344.1      | Baculovirus       | N-(AA13-1304)-His-C   | Sino          | 40607-V08B    |
